# Supplementary material
Source: PubMed Central journal article supplement (PMC4068689)
Supplement: AEM.00740-14_zam999105479so1.pdf [file AEM.00740-14_zam999105479so1.pdf]

## SUPPLEMENTAL MATERIAL

MS/MS data acquired through WARP-LC were searched on MASCOT (Version 2.4.1) using ProteinScape (Version 3.0, Bruker Daltonics) with the search restricted to *Salmonella* on the UniProtKB/SwissProt database (status May 2013). This search was limited to tryptic peptides with variable methionine, histidine, and tryptophan oxidation, and MS/MS mass tolerance of  $\pm 0.8$  Da. The peptide mass tolerance was set to  $\pm 100$  ppm. The peptide charge was defined as +1 and two miscleavages were allowed. A peptide decoy database as well as percolator algorithm were used to improve significance of search results.

The analysis of the acquired data by searching the UniProtKB/SwissProt database yielded a number of proteins for each sample, ranging from 239 to 322 proteins. As a comparison, the number of protein peaks found by classical whole cell protein MALDI-TOF MS ranged only from 51 to 59.

Table S1 gives an overview of the biomarker peptides identified for the three subspecies *Salmonella enterica* subsp. *arizonae*, *S. enterica* subsp. *enterica*, and *S. enterica* subsp. *houtenae* which were assigned to *Salmonella* proteins in the MASCOT search on the UniProtKB/SwissProt database. Of note, no biomarker peptides could be annotated to *S. enterica* subsp. *houtenae*, since the UniProtKB/SwissProt database contained only two protein entries for this subspecies at the time of the analysis, namely the guanine nucleotide exchange factor SopE and the inositol phosphate phosphatase SopB, to none of which a biomarker peptide could be annotated.

| <i>Salmonella</i> subspecies | Assigned protein                                              | Protein mass (kDa) | Biomarker peptide mass (Da)           | Amino acid exchange (subspecies)                                                                                                                  | Search parameters ( $\pm$ ppm) <sup>o</sup> |
|------------------------------|---------------------------------------------------------------|--------------------|---------------------------------------|---------------------------------------------------------------------------------------------------------------------------------------------------|---------------------------------------------|
| <i>S. arizonae</i>           | 6-phospho-gluconolactonase                                    | 36.4               | 3,004.52 $\pm$ 0.03                   | A $\rightarrow$ C, Y $\rightarrow$ H, A $\rightarrow$ V (ent)<br>A $\rightarrow$ C, Y $\rightarrow$ H, A $\rightarrow$ V, E $\rightarrow$ A (hou) | 25<br>50<br>100                             |
| <i>S. arizonae</i>           | 60 kDa chaperonin                                             | 57.3               | 1,602.88 $\pm$ 0.01                   | N $\rightarrow$ T (ent*, hou*)                                                                                                                    | 25                                          |
| <i>S. arizonae</i>           | ATP-dependent protease ATP-binding subunit HslU               | 49.6               | 2,889.48 $\pm$ 0.00                   | V $\rightarrow$ I, T $\rightarrow$ A (ent*, hou*)                                                                                                 | 25<br>50<br>100                             |
| <i>S. arizonae</i>           | Cell division protein ZipA homolog                            | 36.1               | 2,457.00 $\pm$ 0.02                   | DA $\rightarrow$ EE (ent*)<br>S $\rightarrow$ A, DA $\rightarrow$ EE (hou*)                                                                       | 25                                          |
| <i>S. arizonae</i>           | Lysine-tRNA ligase                                            | 57.6               | 2,923.32 $\pm$ 0.05                   | Q $\rightarrow$ L (ent, hou)                                                                                                                      | 50                                          |
| <i>S. arizonae</i>           | Molecular chaperone DnaK                                      | 69.3               | 2,464.23 $\pm$ 0.00                   | M $\rightarrow$ T (ent*, hou*)                                                                                                                    | 25                                          |
| <i>S. enterica</i>           | 50S ribosomal protein L17                                     | 14.4               | 2,551.20 $\pm$ 0.02                   | (-) $\rightarrow$ S, T $\rightarrow$ A (ari*, hou*)                                                                                               | 25<br>50<br>100                             |
|                              |                                                               |                    | 2,567.19 $\pm$ 0.02 (oxidized)        | (-) $\rightarrow$ S, T $\rightarrow$ A (ari*, hou*)                                                                                               | 25<br>50<br>100                             |
| <i>S. enterica</i>           | Flagella synthesis protein FlgN                               | 16.0               | 3,103.55 $\pm$ 0.01                   | D $\rightarrow$ N, S $\rightarrow$ A (ari)<br>D $\rightarrow$ N (hou)                                                                             | 25<br>50<br>100                             |
| <i>S. enterica</i>           | Glutamine-fructose-6-phosphate aminotransferase [isomerizing] | 66.8               | 2,722.40 $\pm$ 0.02                   | A $\rightarrow$ S (ari, hou)                                                                                                                      | 25<br>50<br>100                             |
| <i>S. enterica</i>           | Glutaredoxin-1 Grx1                                           | 9.9                | 1,114.49 $\pm$ 0.01                   | K $\rightarrow$ N (ari, hou)                                                                                                                      | 25                                          |
| <i>S. enterica</i>           | H-NS histone family                                           | 15.5               | 1,979.88 $\pm$ 0.01                   | MD $\rightarrow$ IN (ari)<br>D $\rightarrow$ G (hou)                                                                                              | 25                                          |
| <i>S. enterica</i>           | Nucleoside diphosphate kinase                                 | 15.5               | 2,424.11 $\pm$ 0.02                   | L $\rightarrow$ F (ari*, hou*)                                                                                                                    | 25                                          |
| <i>S. enterica</i>           | Outer membrane protein A                                      | 38.4               | 3,540.76 $\pm$ 0.03                   | V $\rightarrow$ T, P $\rightarrow$ A, T $\rightarrow$ Y (ari)<br>V $\rightarrow$ A, GP $\rightarrow$ (-)Y (hou)                                   | 25<br>50<br>100                             |
|                              |                                                               |                    | 3,956.00 $\pm$ 0.04 (missed cleavage) | V $\rightarrow$ T, P $\rightarrow$ A, T $\rightarrow$ Y (ari)<br>V $\rightarrow$ A, GP $\rightarrow$ (-)Y (hou)                                   | 25<br>50<br>100                             |
| <i>S. enterica</i>           | Probable thiol peroxidase                                     | 18.0               | 2,379.23 $\pm$ 0.01                   | S $\rightarrow$ N (ari)<br>T $\rightarrow$ A (hou)                                                                                                | 25                                          |
| <i>S. enterica</i>           | Transaldolase 1                                               | 35.1               | 3,048.54 $\pm$ 0.02                   | H $\rightarrow$ N (ari, hou)                                                                                                                      | 25<br>50<br>100                             |

TABLE S1 Complete list of biomarker peptides assigned to *Salmonella* proteins in the MASCOT search on the UniProtKB/SwissProt database. The peptide masses are given as the arithmetic mean calculated from the values of the three replicates of the subspecies with the according standard deviation. All numbers were rounded to the second digit after the coma.

\*: Sequence analogous to biomarker peptide observed. (-): missing amino acid. °: for all searches S/N = 10. ari: *S. enterica* subsp. *arizonae*, ent: *S. enterica* subsp. *enterica*, hou: *S. enterica* subsp. *houtenae*.

| <i>Salmonella</i> subspecies | Assigned protein                                | Protein mass (kDa) | Biomarker peptide mass (Da)           | Amino acid exchange (subspecies)                                                                                                                  | Search parameters ( $\pm$ ppm) <sup>o</sup> |
|------------------------------|-------------------------------------------------|--------------------|---------------------------------------|---------------------------------------------------------------------------------------------------------------------------------------------------|---------------------------------------------|
| <i>S. arizonae</i>           | 6-phospho-gluconolactonase                      | 36.4               | 3,004.52 $\pm$ 0.03                   | A $\rightarrow$ C, Y $\rightarrow$ H, A $\rightarrow$ V (ent)<br>A $\rightarrow$ C, Y $\rightarrow$ H, A $\rightarrow$ V, E $\rightarrow$ A (hou) | 25<br>50<br>100                             |
| <i>S. arizonae</i>           | 60 kDa chaperonin                               | 57.3               | 1,602.88 $\pm$ 0.01                   | N $\rightarrow$ T (ent*, hou*)                                                                                                                    | 25                                          |
| <i>S. arizonae</i>           | Aminoacyl-histidine dipeptidase                 | 52.5               | 2,704.27 $\pm$ 0.03                   | K $\rightarrow$ T (ent*, hou)                                                                                                                     | 25<br>50<br>100                             |
| <i>S. arizonae</i>           | Arsenate reductase                              | 13.4               | 1,420.81 $\pm$ 0.00                   | E $\rightarrow$ D (ent*)<br>E $\rightarrow$ D, G $\rightarrow$ S (hou*)                                                                           | 25                                          |
| <i>S. arizonae</i>           | ATP-dependent protease ATP-binding subunit HslU | 49.6               | 2,889.48 $\pm$ 0.00                   | V $\rightarrow$ I, T $\rightarrow$ A (ent*, hou*)                                                                                                 | 25<br>50<br>100                             |
| <i>S. arizonae</i>           | Cell division protein DamX                      | 45.3               | 2,643.06 $\pm$ 0.01                   | V $\rightarrow$ D (ent*, hou*)                                                                                                                    | 25<br>50<br>100                             |
| <i>S. arizonae</i>           | Chromosomal replication initiation protein      | 49.9               | 2,235.13 $\pm$ 0.01                   | P $\rightarrow$ S (ent, hou)                                                                                                                      | 25                                          |
| <i>S. arizonae</i>           | DNA-binding transcriptional regulator PhoP      | 25.7               | 1,482.89 $\pm$ 0.01                   | L $\rightarrow$ S (ent*, hou*)                                                                                                                    | 25                                          |
| <i>S. arizonae</i>           | Ferric uptake regulator                         | 17.0               | 3,291.42 $\pm$ 0.01                   | Q $\rightarrow$ H (ent)<br>E $\rightarrow$ D, Q $\rightarrow$ H (hou)                                                                             | 25<br>50                                    |
| <i>S. arizonae</i>           | Fructose-bisphosphate aldolase                  | 38.1               | 2,914.46 $\pm$ 0.01                   | S $\rightarrow$ A (ent, hou*)                                                                                                                     | 25<br>50<br>100                             |
| <i>S. arizonae</i>           | Heat shock protein                              | 17.7               | 2,955.56 $\pm$ 0.01                   | S $\rightarrow$ L (ent, hou)                                                                                                                      | 25<br>50<br>100                             |
| <i>S. arizonae</i>           | Hydrogenase nickel incorporation protein HypB   | 31.4               | 3,764.78 $\pm$ 0.11                   | K $\rightarrow$ N, T $\rightarrow$ A (ent*, hou)                                                                                                  | 100                                         |
| <i>S. arizonae</i>           | Hypothetical protein SARI_01500                 | 34.0               | 3,305.78 $\pm$ 0.00                   | I $\rightarrow$ V (ent*, hou*)                                                                                                                    | 25<br>50                                    |
| <i>S. arizonae</i>           | Hypothetical protein SARI_03463                 | 10.5               | 2,231.05 $\pm$ 0.00                   | H $\rightarrow$ Y (ent*, hou)                                                                                                                     | 25                                          |
| <i>S. arizonae</i>           | Isoprenoid biosynthesis protein                 | 22.9               | 2,747.45 $\pm$ 0.02                   | E $\rightarrow$ D, A $\rightarrow$ S (ent*)<br>A $\rightarrow$ S (hou*)                                                                           | 25                                          |
|                              |                                                 |                    | 3,117.72 $\pm$ 0.01 (missed cleavage) | E $\rightarrow$ D, A $\rightarrow$ S (ent*)<br>A $\rightarrow$ S (hou*)                                                                           | 25                                          |

|                    |                                                |       |                                      |                                                            |                 |
|--------------------|------------------------------------------------|-------|--------------------------------------|------------------------------------------------------------|-----------------|
| <i>S. arizonae</i> | Membrane protein                               | 15.7  | 3,051.48 ± 0.02                      | L→I, T→A (ent*)<br>L→I, M→V, T→A (hou*)                    | 25<br>50<br>100 |
| <i>S. arizonae</i> | Molecular chaperone DnaK                       | 69.3  | 2,464.23 ± 0.00                      | M→T (ent*, hou*)                                           | 25              |
| <i>S. arizonae</i> | N-acetyltransferase                            | 18.6  | 1,011.45 ± 0.00                      | R→K (ent, hou)                                             | 25              |
| <i>S. arizonae</i> | N-ethylmaleimide reductase                     | 39.5  | 2,590.17 ± 0.02                      | K→E, E→A (ent*)<br>E→A (hou*)                              | 25              |
|                    |                                                |       | 2,789.30 ± 0.01<br>(missed cleavage) | K→E, E→A (ent*)<br>E→A (hou*)                              | 25              |
| <i>S. arizonae</i> | NADH dehydrogenase subunit G                   | 100.0 | 3,009.44 ± 0.01                      | H→Q (ent)<br>A→T, D→G, H→Q (hou)                           | 25<br>50<br>100 |
| <i>S. arizonae</i> | Outer-membrane lipoprotein carrier protein     | 22.5  | 2,725.27 ± 0.01                      | S→A (ent, hou)                                             | 25<br>50<br>100 |
| <i>S. arizonae</i> | Outer membrane porin protein C                 | 41.2  | 2,433.06 ± 0.01                      | N→S (ent*, hou*)                                           | 25              |
| <i>S. arizonae</i> | Outer membrane protein A                       | 38.6  | 1,221.67 ± 0.00                      | N→D (ent*, hou*)                                           | 25              |
| <i>S. arizonae</i> | Peptidyl-prolyl cis-trans isomerase SurA       | 47.2  | 3,771.96 ± 0.03                      | N→S, G→E (ent, hou*)                                       | 25<br>50<br>100 |
| <i>S. arizonae</i> | Phosphoenolpyruvate-protein phosphotransferase | 63.3  | 3,073.57 ± 0.01                      | FI→YL (ent*, hou*)                                         | 25<br>50<br>100 |
| <i>S. arizonae</i> | Pyruvate dehydrogenase subunit E1              | 99.6  | 2,649.29 ± 0.03                      | V→I (ent*, hou*)                                           | 25<br>50<br>100 |
| <i>S. arizonae</i> | Ribonuclease E                                 | 120.0 | 3,602.85 ± 0.04                      | T→V, I→V (ent*)<br>T→A, I→V (hou)<br>T→A, T→A, I→V (hou*)  | 25<br>50<br>100 |
| <i>S. enterica</i> | Cell division protein DamX                     | 45.5  | 3,153.62 ± 0.03                      | TT→AP, TA→KV (ari•)<br>A→T, T→K, A→T (hou)                 | 25<br>50<br>100 |
| <i>S. enterica</i> | CRISPR system CASCADE complex protein CasC     | 38.7  | 2,377.21 ± 0.03                      | not found (ari)<br>YE→FQ, ING→VRD,<br>LNV→IPA, VK→IT (hou) | 25<br>50<br>100 |
| <i>S. enterica</i> | Flagella synthesis protein FlgN                | 16.0  | 3,103.55 ± 0.01                      | D→N, S→A (ari)<br>D→N (hou*)                               | 25<br>50<br>100 |
| <i>S. enterica</i> | Formate acetyltransferase 1                    | 85.0  | 2,250.99 ± 0.01                      | D→E, K→T (ari, hou)                                        | 25              |
| <i>S. enterica</i> | Fumarate hydratase                             | 51.8  | 2,460.30 ± 0.01                      | P→S (ari)<br>L→M (hou*)                                    | 25<br>50<br>100 |
| <i>S. enterica</i> | Glutaredoxin-1 Grx1                            | 9.9   | 1,114.49 ± 0.01                      | K→N (ari•, hou)                                            | 25              |

|                    |                                                                  |       |                                      |                                                 |                 |
|--------------------|------------------------------------------------------------------|-------|--------------------------------------|-------------------------------------------------|-----------------|
| <i>S. enterica</i> | Glycogen phosphorylase                                           | 84.1  | 2,666.28 ± 0.03                      | K→E (ari*, hou)                                 | 25              |
| <i>S. enterica</i> | H-NS histone family                                              | 15.5  | 1,979.88 ± 0.01                      | MD→IN (ari*)<br>D→G (hou*)                      | 25              |
| <i>S. enterica</i> | Isoprenoid biosynthesis protein                                  | 22.8  | 2,749.45 ± 0.01                      | D→E, S→A (ari*)<br>D→E (hou*)                   | 25<br>50<br>100 |
| <i>S. enterica</i> | N-ethylmaleimide reductase                                       | 39.4  | 2,860.34 ± 0.01                      | E→K, A→E (ari)<br>E→K (hou)                     | 25<br>50        |
| <i>S. enterica</i> | NlpB/DapX lipoprotein                                            | 36.9  | 2,843.33 ± 0.01                      | N→S (ari, hou*)                                 | 25<br>50        |
| <i>S. enterica</i> | Nucleoside diphosphate kinase                                    | 15.5  | 2,424.11 ± 0.02                      | L→F (ari*, hou*)                                | 25              |
| <i>S. enterica</i> | Outer membrane protein A                                         | 38.4  | 3,540.76 ± 0.03                      | V→T, P→A, T→Y (ari*)<br>V→A, GP→(-)Y (hou*)     | 25<br>50<br>100 |
| <i>S. enterica</i> | Peptidyl-prolyl cis-trans isomerase PpiD                         | 58.2  | 2,187.04 ± 0.00                      | V→A, V→T (ari*)<br>V→T (hou*)                   | 25              |
| <i>S. enterica</i> | Probable thiol peroxidase                                        | 18.0  | 2,379.23 ± 0.01                      | S→N (ari*)<br>T→A (hou*)                        | 25              |
| <i>S. enterica</i> | Protease specific for phage lambda cII repressor                 | 45.6  | 2,736.21 ± 0.02                      | N→K (ari, hou)                                  | 25              |
|                    |                                                                  |       | 2,892.31 ± 0.02<br>(missed cleavage) | N→K (ari, hou)                                  | 25              |
| <i>S. enterica</i> | Putative outer membrane protein                                  | 12.8  | 3,224.54 ± 0.02                      | L→F, S→R, S→I, N→Y (ari*)<br>S→T (hou*)         | 25<br>50<br>100 |
| <i>S. enterica</i> | Ribonuclease E                                                   | 119.3 | 2,706.37 ± 0.00                      | S→T (ari*)<br>P→T, S→T (hou*)                   | 25<br>50<br>100 |
|                    |                                                                  |       | 3,046.42 ± 0.02                      | T→A, S→T (ari*)<br>T→A, H→Y (hou*)              | 25<br>50<br>100 |
|                    |                                                                  |       | 3,586.85 ± 0.02                      | V→T, V→I (ari*)<br>V→A (hou)<br>V→A, T→A (hou*) | 25              |
| <i>S. houtenae</i> | 2,3,4,5-tetrahydropyridine-2,6-carboxylate N-succinyltransferase | 29.8  | 972.40 ± 0.00                        | D→E (ari*, ent*)                                | 25              |
| <i>S. houtenae</i> | 60 kDa chaperonin                                                | 57.2  | 2,980.25 ± 0.04                      | A→G (ari*, ent*)                                | 25              |
|                    |                                                                  |       | 3,336.50 ± 0.02<br>(missed cleavage) | A→G (ari*, ent*)                                | 25<br>50<br>100 |

|                    |                                            |       |                 |                                                      |                 |
|--------------------|--------------------------------------------|-------|-----------------|------------------------------------------------------|-----------------|
| <i>S. houtenae</i> | Cell division protein DamX                 | 45.6  | 1,925.13 ± 0.01 | VA→AT, RP→ST,<br>PAA→(-) (-) (-) (ari*)<br>P→T (ent) | 25<br>50        |
| <i>S. houtenae</i> | Cell division protein MukB                 | 170.0 | 1,453.78 ± 0.01 | T→S (ari, ent)                                       | 25              |
| <i>S. houtenae</i> | Cytochrome d ubiquinol oxidase subunit 3   | 15.0  | 1,812.85 ± 0.01 | G→S (ari*, ent*)                                     | 25              |
| <i>S. houtenae</i> | DNA-binding transcriptional regulator KdgR | 29.9  | 1,881.78 ± 0.01 | E→A (ari*, ent*)                                     | 25<br>50        |
| <i>S. houtenae</i> | Elongation factor G                        | 77.4  | 3,062.52 ± 0.02 | D→E (ari, ent*)                                      | 25<br>50<br>100 |
| <i>S. houtenae</i> | Flagella synthesis protein FlgN            | 16.0  | 3,102.61 ± 0.05 | S→A (ari)<br>N→D (ent*)                              | 50<br>100       |
| <i>S. houtenae</i> | Hydrogenase formation protein HypD         | 41.1  | 2,240.03 ± 0.01 | H→R (ari*, ent)                                      | 25              |
| <i>S. houtenae</i> | Isoprenoid biosynthesis protein            | 22.9  | 2,763.46 ± 0.02 | S→A (ari*)<br>E→D (ent*)                             | 25              |
| <i>S. houtenae</i> | NAD(P)H:quinone oxidoreductase, type IV    | 20.9  | 2,703.34 ± 0.04 | E→D (ari*, ent*)                                     | 50<br>100       |
| <i>S. houtenae</i> | NlpB/DapX lipoprotein                      | 36.9  | 2,504.25 ± 0.01 | D→E, V→P (ari)<br>V→A (ent*)                         | 25              |
| <i>S. houtenae</i> | Outer membrane protein A                   | 38.4  | 3,521.70 ± 0.02 | A→T, Y→GA, T→Y (ari*)<br>A→V, Y→GP (ent*)            | 25<br>50<br>100 |
| <i>S. houtenae</i> | Sigma-E factor negative regulatory protein | 24.2  | 2,662.39 ± 0.01 | L→Q (ari*, ent*)                                     | 25<br>50<br>100 |
| <i>S. houtenae</i> | Universal stress protein G                 | 15.8  | 1,090.67 ± 0.00 | S→T (ari*, ent*)                                     | 25              |
| <i>S. houtenae</i> | Valyl-tRNA synthetase                      | 108.1 | 1,056.65 ± 0.00 | V→I (ari, ent*)                                      | 25              |

TABLE S2 Complete list of biomarker peptides assigned to *Salmonella* proteins in the MASCOT search on the NCBI database. The peptide masses are given as the arithmetic mean calculated from the values of the three replicates of the subspecies with the according standard deviation. All numbers were rounded to the second digit after the coma.

\*: Sequence analogous to biomarker peptide observed. •: shorter or longer peptide sequence containing at least one relevant amino acid exchange was observed. (-): missing amino acid. °: for all searches S/N = 10. ari: *S. enterica* subsp. *arizonae*, ent: *S. enterica* subsp. *enterica*, hou: *S. enterica* subsp. *houtenae*.
